# Supplementary material for: Visual Detection and Evaluation of Latent and Lytic Gene Expression during Epstein-Barr Virus Infection Using One-Step Reverse Transcription Loop-Mediated Isothermal Amplification
Source: PubMed Central journal article supplement (PMC3876086; doi:10.3390/ijms141223922), 2013-12-09
Supplement: ijms-14-23922-s001.pdf [file ijms-14-23922-s001.pdf]

## Supplementary Information

**Table S1.** EBV latent/lytic gene expression in patients with EBV primary infection by RT-LAMP (group 1).

| Subjects | No. (%) of 51 Specimens with Pos Result |                               |                                 |                                    |                       |       |
|----------|-----------------------------------------|-------------------------------|---------------------------------|------------------------------------|-----------------------|-------|
|          | EBNA1 Lat<br>I/II/III <sup>a</sup>      | EBNA2<br>Lat III <sup>a</sup> | LMP1 lat<br>II/III <sup>a</sup> | LMP2A Lat<br>0/II/III <sup>a</sup> | BZLF1 IE <sup>b</sup> | GAPDH |
| 1        | Neg <sup>c</sup>                        | Neg                           | Neg                             | Neg                                | Neg                   | Pos   |
| 2        | Neg                                     | Neg                           | Neg                             | Neg                                | Neg                   | Pos   |
| 3        | Neg                                     | Neg                           | Neg                             | Neg                                | Pos <sup>d</sup>      | Pos   |
| 4        | Neg                                     | Neg                           | Neg                             | Neg                                | Neg                   | Pos   |
| 5        | Neg                                     | Neg                           | Neg                             | Neg                                | Pos                   | Pos   |
| 6        | Neg                                     | Neg                           | Neg                             | Neg                                | Pos                   | Pos   |
| 7        | Neg                                     | Neg                           | Neg                             | Neg                                | Neg                   | Pos   |
| 8        | Pos                                     | Pos                           | Pos                             | Pos                                | Pos                   | Pos   |
| 9        | Neg                                     | Neg                           | Pos                             | Pos                                | Neg                   | Pos   |
| 10       | Neg                                     | Neg                           | Neg                             | Neg                                | Neg                   | Pos   |
| 11       | Neg                                     | Neg                           | Neg                             | Neg                                | Pos                   | Pos   |
| 12       | Neg                                     | Neg                           | Neg                             | Neg                                | Neg                   | Pos   |
| 13       | Neg                                     | Neg                           | Pos                             | Pos                                | Neg                   | Pos   |
| 14       | Neg                                     | Neg                           | Neg                             | Neg                                | Neg                   | Pos   |
| 15       | Neg                                     | Neg                           | Neg                             | Neg                                | Neg                   | Pos   |
| 16       | Neg                                     | Neg                           | Neg                             | Neg                                | Pos                   | Pos   |
| 17       | Neg                                     | Neg                           | Neg                             | Neg                                | Neg                   | Pos   |
| 18       | Pos                                     | Pos                           | Pos                             | Pos                                | Neg                   | Pos   |
| 19       | Neg                                     | Neg                           | Pos                             | Pos                                | Neg                   | Pos   |
| 20       | Neg                                     | Neg                           | Neg                             | Neg                                | Pos                   | Pos   |
| 21       | Neg                                     | Neg                           | Neg                             | Neg                                | Neg                   | Pos   |
| 22       | Neg                                     | Neg                           | Neg                             | Neg                                | Neg                   | Pos   |
| 23       | Neg                                     | Neg                           | Neg                             | Neg                                | Neg                   | Pos   |
| 24       | Neg                                     | Neg                           | Neg                             | Neg                                | Pos                   | Pos   |
| 25       | Neg                                     | Neg                           | Neg                             | Neg                                | Pos                   | Pos   |
| 26       | Neg                                     | Neg                           | Neg                             | Pos                                | Neg                   | Pos   |
| 27       | Neg                                     | Neg                           | Neg                             | Neg                                | Pos                   | Pos   |
| 28       | Neg                                     | Neg                           | Neg                             | Neg                                | Neg                   | Pos   |
| 29       | Neg                                     | Neg                           | Neg                             | Neg                                | Pos                   | Pos   |
| 30       | Neg                                     | Neg                           | Neg                             | Neg                                | Pos                   | Pos   |
| 31       | Neg                                     | Neg                           | Neg                             | Neg                                | Neg                   | Pos   |
| 32       | Neg                                     | Neg                           | Pos                             | Pos                                | Neg                   | Pos   |
| 33       | Neg                                     | Neg                           | Neg                             | Neg                                | Pos                   | Pos   |
| 34       | Neg                                     | Neg                           | Neg                             | Neg                                | Neg                   | Pos   |
| 35       | Neg                                     | Neg                           | Neg                             | Neg                                | Pos                   | Pos   |
| 36       | Neg                                     | Neg                           | Neg                             | Neg                                | Neg                   | Pos   |
| 37       | Neg                                     | Neg                           | Neg                             | Neg                                | Neg                   | Pos   |
| 38       | Neg                                     | Neg                           | Pos                             | Pos                                | Neg                   | Pos   |
| 39       | Neg                                     | Neg                           | Neg                             | Neg                                | Pos                   | Pos   |
| 40       | Neg                                     | Neg                           | Neg                             | Neg                                | Pos                   | Pos   |
| 41       | Neg                                     | Neg                           | Neg                             | Neg                                | Pos                   | Pos   |
| 42       | Neg                                     | Neg                           | Neg                             | Neg                                | Neg                   | Pos   |
| 43       | Neg                                     | Neg                           | Pos                             | Pos                                | Neg                   | Pos   |
| 44       | Neg                                     | Neg                           | Neg                             | Pos                                | Neg                   | Pos   |
| 45       | Neg                                     | Neg                           | Neg                             | Neg                                | Neg                   | Pos   |
| 46       | Neg                                     | Neg                           | Neg                             | Neg                                | Pos                   | Pos   |
| 47       | Neg                                     | Neg                           | Neg                             | Neg                                | Pos                   | Pos   |
| 48       | Neg                                     | Neg                           | Neg                             | Neg                                | Pos                   | Pos   |
| 49       | Neg                                     | Neg                           | Neg                             | Neg                                | Neg                   | Pos   |
| 50       | Neg                                     | Neg                           | Neg                             | Neg                                | Pos                   | Pos   |
| 51       | Neg                                     | Neg                           | Neg                             | Pos                                | Neg                   | Pos   |

<sup>a</sup> Latent transcript expression; <sup>b</sup> Lytic gene expression; <sup>c</sup> Pos, Positive; Neg, Negative.

**Table S2.** EBV latent/lytic gene expression in patients with EBV past infection by RT-LAMP (group 2).

| Subjects | No. (%) of 37 Specimens with Positive Result |                               |                                 |                                    |                          |       |
|----------|----------------------------------------------|-------------------------------|---------------------------------|------------------------------------|--------------------------|-------|
|          | EBNA1 Lat<br>I/II/III <sup>a</sup>           | EBNA2<br>Lat III <sup>a</sup> | LMP1 Lat<br>II/III <sup>a</sup> | LMP2A Lat<br>0/II/III <sup>a</sup> | BZLF1<br>IE <sup>b</sup> | GAPDH |
| 1        | Neg <sup>c</sup>                             | Neg                           | Neg                             | Neg                                | Neg                      | Pos   |
| 2        | Pos                                          | Neg                           | Neg                             | Pos <sup>d</sup>                   | Neg                      | Pos   |
| 3        | Pos                                          | Neg                           | Neg                             | Pos                                | Neg                      | Pos   |
| 4        | Neg                                          | Neg                           | Neg                             | Pos                                | Neg                      | Pos   |
| 5        | Pos                                          | Neg                           | Neg                             | Neg                                | Neg                      | Pos   |
| 6        | Pos                                          | Neg                           | Neg                             | Pos                                | Neg                      | Pos   |
| 7        | Neg                                          | Neg                           | Neg                             | Neg                                | Neg                      | Pos   |
| 8        | Pos                                          | Neg                           | Neg                             | Neg                                | Neg                      | Pos   |
| 9        | Pos                                          | Neg                           | Neg                             | Pos                                | Neg                      | Pos   |
| 10       | Pos                                          | Neg                           | Neg                             | Neg                                | Neg                      | Pos   |
| 11       | Pos                                          | Neg                           | Neg                             | Pos                                | Neg                      | Pos   |
| 12       | Neg                                          | Neg                           | Neg                             | Pos                                | Neg                      | Pos   |
| 13       | Neg                                          | Neg                           | Neg                             | Neg                                | Neg                      | Pos   |
| 14       | Neg                                          | Neg                           | Neg                             | Pos                                | Neg                      | Pos   |
| 15       | Pos                                          | Neg                           | Neg                             | Neg                                | Neg                      | Pos   |
| 16       | Neg                                          | Neg                           | Neg                             | Pos                                | Neg                      | Pos   |
| 17       | Pos                                          | Neg                           | Neg                             | Pos                                | Neg                      | Pos   |
| 18       | Neg                                          | Neg                           | Neg                             | Neg                                | Neg                      | Pos   |
| 19       | Neg                                          | Neg                           | Neg                             | Pos                                | Neg                      | Pos   |
| 20       | Pos                                          | Neg                           | Neg                             | Pos                                | Neg                      | Pos   |
| 21       | Neg                                          | Neg                           | Neg                             | Pos                                | Neg                      | Pos   |
| 22       | Pos                                          | Neg                           | Neg                             | Neg                                | Neg                      | Pos   |
| 23       | Neg                                          | Neg                           | Neg                             | Neg                                | Neg                      | Pos   |
| 24       | Pos                                          | Neg                           | Neg                             | Pos                                | Neg                      | Pos   |
| 25       | Pos                                          | Neg                           | Neg                             | Neg                                | Neg                      | Pos   |
| 26       | Neg                                          | Neg                           | Neg                             | Pos                                | Neg                      | Pos   |
| 27       | Neg                                          | Neg                           | Neg                             | Pos                                | Neg                      | Pos   |
| 28       | Pos                                          | Neg                           | Neg                             | Neg                                | Neg                      | Pos   |
| 29       | Pos                                          | Neg                           | Neg                             | Pos                                | Neg                      | Pos   |
| 30       | Pos                                          | Neg                           | Neg                             | Pos                                | Neg                      | Pos   |
| 31       | Neg                                          | Neg                           | Neg                             | Neg                                | Neg                      | Pos   |
| 32       | Neg                                          | Neg                           | Neg                             | Pos                                | Neg                      | Pos   |
| 33       | Pos                                          | Neg                           | Neg                             | Neg                                | Neg                      | Pos   |
| 34       | Pos                                          | Neg                           | Neg                             | Pos                                | Neg                      | Pos   |
| 35       | Neg                                          | Neg                           | Neg                             | Pos                                | Neg                      | Pos   |
| 36       | Pos                                          | Neg                           | Neg                             | Pos                                | Neg                      | Pos   |
| 37       | Pos                                          | Neg                           | Neg                             | Pos                                | Neg                      | Pos   |

<sup>a</sup> Latent transcript expression; <sup>b</sup> Lytic gene expression; <sup>c</sup> Pos, Positive; Neg, Negative.

**Table S3.** Primers and/or probes used for RT-qPCR and conventional RT-PCR.

| Method                 | Primer and Probe            | Position <sup>a</sup>                    | Product Size (bp)                        | Sequence (5'-3')                          |                            |
|------------------------|-----------------------------|------------------------------------------|------------------------------------------|-------------------------------------------|----------------------------|
| Conventional<br>RT-PCR | <i>LMP1</i> FP <sup>b</sup> | 511–530                                  | 160                                      | CTCCTTTGGCTCCTCCTGTT                      |                            |
|                        | <i>LMP1</i> RP <sup>b</sup> | 650–670                                  |                                          | GTCTGCCCTCGTTGGAGTTAG                     |                            |
|                        | <i>LMP2A</i> FP             | 205–226                                  | 152                                      | GACCGTCACTCGGACTATCAAC                    |                            |
|                        | <i>LMP2A</i> RP             | 338–356                                  |                                          | CTTCCTCTGCCCCGCTTCTT                      |                            |
|                        | <i>EBNA1</i> FP             | 170–188                                  | 234                                      | GGTTTGGAAAGCATCGTGG                       |                            |
|                        | <i>EBNA1</i> RP             | 383–403                                  |                                          | CAAAGGGGAGACGACTCAATG                     |                            |
|                        | <i>EBNA2</i> FP             | 1873–1892                                | 202                                      | GGGCATGGACCTCTAGCATC                      |                            |
|                        | <i>EBNA2</i> RP             | 2055–2074                                |                                          | GGGTAAGCCTCGGTTGTGAC                      |                            |
|                        | <i>BZLF1</i> FP             | 273–293                                  | 227                                      | ACCTCAGCTGTTCCAGT CTC                     |                            |
|                        | <i>BZLF1</i> RP             | 479–499                                  |                                          | ATTCTGGCTGTWGTGGTTTCC <sup>c</sup>        |                            |
|                        | <i>GAPDH</i> FP             | 528–548                                  | 247                                      | TGGTATCGTGGAAGGACTCAT                     |                            |
|                        | <i>GAPDH</i> RP             | 755–774                                  |                                          | TTCTAGACGGCAGGTCAGGT                      |                            |
|                        | RT-qPCR                     | <i>LMP1</i> FP                           | 247–272                                  | 98                                        | CTTTGTCTACTCCTACTGATGATCAC |
|                        |                             | <i>LMP1</i> RP                           | 323–344                                  |                                           | CCGAAGATGAACAGCACAAATC     |
| <i>LMP1</i> Probe      |                             | 282–307                                  | FAM-CATCGCTCTCTGGAATTTGCA<br>CGGAC-TAMRA |                                           |                            |
| <i>LMP2A</i> FP        |                             | 264–282                                  | 92                                       | GCAACACGACGGGAATGAC                       |                            |
| <i>LMP2A</i> RP        |                             | 337–355                                  |                                          | TTCCTCTGCCCCGCTTCTTC                      |                            |
| <i>LMP2A</i> Probe     |                             | 299–323                                  |                                          | FAM-CCTACTCTCCACGGGATGACT<br>CATC-TAMRA   |                            |
| <i>EBNA1</i> FP        |                             | 270–289                                  | 129                                      | GAGCCTGACCTGTGATCGTC                      |                            |
| <i>EBNA1</i> RP        |                             | 378–399                                  |                                          | TAGGCCATTTCCAGGTCCTGTA                    |                            |
| <i>EBNA1</i> Probe     |                             | 333–357                                  |                                          | FAM-CGGCCGTCTCCTTTAAGTGTG<br>AATC-TAMRA   |                            |
| <i>EBNA2</i> FP        |                             | 878–900                                  | 127                                      | AGAGAGTGGCTGCTACGCATTAG                   |                            |
| <i>EBNA2</i> RP        |                             | 983–1004                                 |                                          | TCACAAATCACCTGGCTAAGCC                    |                            |
| <i>EBNA2</i> Probe     |                             | 921–947                                  |                                          | FAM-CAGTAACCACCCAGCGCCAAT<br>CTGTCT-TAMRA |                            |
| <i>BZLF1</i> FP        |                             | 495–513                                  | 88                                       | AGAATCGCTGGAGGAATGC                       |                            |
| <i>BZLF1</i> RP        |                             | 563–582                                  |                                          | CTTAAACTTGGCCCCGGCATT                     |                            |
| <i>BZLF1</i> Probe     | 523–547                     | FAM-CTAGAAATAAAGCGATAACAAG<br>AATC-TAMRA |                                          |                                           |                            |
| <i>GAPDH</i> FP        | 33–51                       | 223                                      | GGTGAAGGTCGGAGTCAAC                      |                                           |                            |
| <i>GAPDH</i> RP        | 236–255                     |                                          | GAAGATGGTGATGGGATTC                      |                                           |                            |
| <i>GAPDH</i> Probe     | 116–135                     |                                          | FAM-TTGCCATCAATGACCCCTTC-T<br>AMRA       |                                           |                            |

<sup>a</sup> Nucleotide positions; <sup>b</sup> FP (forward primer), RP(reverse primer); <sup>c</sup> W = A/T.
